# Supplementary material for: The Interaction Effect of Anti-RgpA and Anti-PPAD Antibody Titers: An Indicator for Rheumatoid Arthritis Diagnosis
Source: MDPI journal article supplement (doi:10.3390/jcm12083027), 2023-04-21
Supplement: s1 [file s1]

**Table S1.** Comparison of Anti-RgpA, Anti-PPAD and Anti-PPAD/RgpA double positive with periodontitis markers stratified by presence or absence of RA.

| Variable                    | AR      |                | Control |              | AR      |              | Control |              | AR      |         | Control |         | AR      |         | Control |         |
|-----------------------------|---------|----------------|---------|--------------|---------|--------------|---------|--------------|---------|---------|---------|---------|---------|---------|---------|---------|
|                             | RgpA    |                | RgpA    |              | RgpA    |              | RgpA    |              | PPAD    |         | PPAD    |         | PPAD    |         | PPAD    |         |
|                             | <Q2     | >Q2            | <Q2     | >Q2          | <Q2     | >Q2          | <Q2     | >Q2          | <Q2     | >Q2     | <Q2     | >Q2     | <Q2     | >Q2     | <Q2     | >Q2     |
| <b>Number of Teeth</b>      |         |                |         |              |         |              |         |              |         |         |         |         |         |         |         |         |
| Median                      | 19      | 21             | 25      | 26           | 20      | 21           | 25      | 25           | 20      | 19      | 25      | 25      | 20      | 19      | 25      | 25      |
| (IQR)                       | (12-25) | (13-25)        | (21-28) | (20-28)      | (12-25) | (15-25)      | (21-28) | (20-28)      | (13-25) | (12-25) | (20-28) | (21-28) | (13-25) | (11-25) | (21-28) | (21-28) |
| <b>Plaque Index%</b>        |         |                |         |              |         |              |         |              |         |         |         |         |         |         |         |         |
| Median                      | 61      | 71             | 53      | 51           | 64      | 73           | 54      | 49           | 64      | 71      | 57      | 27      | 69      | 66      | 54      | 46      |
| (IQR)                       | (18-81) | (41-87)        | (36-66) | (34-75)      | (33-82) | (41-89)      | (38-68) | (23-77)      | (33-82) | (36-88) | (42-61) | (28-66) | (40-84) | (33-88) | (4-67)  | (27-71) |
| <b>Gingival Index%</b>      |         |                |         |              |         |              |         |              |         |         |         |         |         |         |         |         |
| Median                      | 44      | 52             | 32      | 29           | 48      | 53           | 32      | 16           | 48      | 50      | 33      | 31      | 52      | 48      | 33      | 3       |
| (IQR)                       | (7-73)  | (1-74)         | (23-48) | (15-57)      | 13-73   | 4-73         | 21-51   | 9-49         | 10-73   | 10-79   | 17-51   | 17-52   | 10-71   | 10-81   | 18-49   | 16-57   |
| <b>Bleeding on probing%</b> |         |                |         |              |         |              |         |              |         |         |         |         |         |         |         |         |
| Median                      | 36      | <b>49**</b>    | 40      | 37           | 41      | <b>55**</b>  | 40      | 32           | 44      | 47      | 40      | 39      | 46      | 49      | 40      | 39      |
| (IQR)                       | (16-58) | <b>(32-68)</b> | (27-50) | (26-54)      | 2-58    | <b>31-59</b> | 27-50   | 8-54         | 26-63   | 20-63   | 27-55   | 24-50   | 26-62   | 20-67   | 27-54   | 28-51   |
| <b>Pocket Depth mm</b>      |         |                |         |              |         |              |         |              |         |         |         |         |         |         |         |         |
| Median                      | 4       | 4              | 4       | 4            | 4       | 4            | 4       | 4            | 4       | 4       | 4       | 4       | 4       | 4       | 4       | 4       |
| (IQR)                       | 1-4.1   | 1-4.2          | 4-4.3   | 1-4.3        | 1-4.1   | 1-4.2        | 4-4.3   | 1-4.2        | 1-4.2   | 1-4.1   | 1-4.2   | 1-4.3   | 1-4.2   | 1-4.1   | 1-4.2   | 4-4.3   |
| <b>CAL mm</b>               |         |                |         |              |         |              |         |              |         |         |         |         |         |         |         |         |
| Median                      | 2.6     | 2.8            | 2.3     | 2.6          | 2.7     | 2.7          | 2.3     | <b>2.7**</b> | 2.8     | 2.7     | 2.4     | 2.3     | 2.8     | 2.7     | 2.4     | 2.3     |
| (IQR)                       | 2.2-3.3 | 2.3-3.3        | 2-2.8   | 2-3.1        | 2.2-3-3 | 2.2-3-3      | 1.9-2.9 | <b>2.4-3</b> | 2.3-3.3 | 2.3-3.5 | 2-3     | 1.9-2.8 | 2.4-3.3 | 2.2-3.5 | 2-3.0   | 1.9-3   |
| <b>CAL (%)</b>              |         |                |         |              |         |              |         |              |         |         |         |         |         |         |         |         |
| Median                      | 85      | 90             | 46      | <b>56**</b>  | 87      | <b>90**</b>  | 52      | 50           | 86      | 87      | 53      | 45      | 87      | 87      | 51      | 50      |
| (IQR)                       | 54-98   | 67-97          | 32-70   | <b>39-84</b> | 60-98   | <b>65-99</b> | 32-77   | 48-70        | 54-97   | 65-97   | 34-78   | 31-70   | 60-97   | 63-96   | 34-72   | 35-82   |

\*\* p<0.05. RIQ= Rango Intercuartil; RgpA= Arg-gingipaina A; PPAD= peptidil arginina deiminasa de *P. gingivalis*; BOP=Sangrado al sondaje; CAL=Perdida de inserción Clínica.
