# Supplementary material for: The Interaction Effect of Anti-RgpA and Anti-PPAD Antibody Titers: An Indicator for Rheumatoid Arthritis Diagnosis
Source: MDPI journal article supplement (doi:10.3390/jcm12083027), 2023-04-21
Supplement: s1 [file s1]

**Table S2.** Comparison of levels of Anti-RgpA, Anti-PPAD and AntiPPAD-RgpA double positive with periodontitis severity and RA activity.

| Variable        | RA<br>Periodontitis + | RA<br>Periodontitis - | RA<br>Severity +  | RA<br>Severity - | RA<br>Activity + | RA<br>Activity - |
|-----------------|-----------------------|-----------------------|-------------------|------------------|------------------|------------------|
| <b>RgpA Q2</b>  |                       |                       |                   |                  |                  |                  |
| <Q2             | 44 (80)               | 11(20)                | 43 (78)           | 12(22)           | 16(29)           | 39(71)           |
| ≥Q2             | 75(85)                | 13(15)                | 75 (85)           | 13(15)           | 31(35)           | 57(65)           |
| <b>RgpA Q1</b>  |                       |                       |                   |                  |                  |                  |
| <Q1             | 79(81)                | 18(19)                | 78 (80)           | 19 (20)          | 28(29)           | 69(72)           |
| >Q1             | 40(87)                | 6(13)                 | 40 (87)           | 6 (13)           | 19(9)            | 27(91)           |
| <b>PPAD</b>     |                       |                       |                   |                  |                  |                  |
| <Q2             | 53(89)                | 6(11)                 | 52(88)            | 7(12)            | 18(31)           | 41(69)           |
| >Q2             | 66(79)                | 18(21)                | 66(79)            | 18 (21)          | 29(35)           | 55(65)           |
| <b>PPAD</b>     |                       |                       |                   |                  |                  |                  |
| <Q1             | <b>79(89)**</b>       | 10(11)                | <b>78 (88) **</b> | 11(12)           | 27(30)           | 62(70)           |
| >Q1             | 40(74)                | 14 (26)               | 40(64)            | 14(36)           | 20(37)           | 34(63)           |
| <b>PPAD/Rg</b>  |                       |                       |                   |                  |                  |                  |
| <b>pAQ2</b>     | 95 (85)               | 17 (15)               | 94 (84)           | 18 (26)          | 18 (30)          | 42(70)           |
| <b>Positive</b> | 24 (77)               | 7 (23)                | 24 (77)           | 7 (33)           | 29 (35)          | 54(65)           |
| <b>Negative</b> |                       |                       |                   |                  |                  |                  |
| <b>PPAD/Rg</b>  |                       |                       |                   |                  |                  |                  |
| <b>pAQ1</b>     | 105(84)               | 20 (16)               | 104(83)           | 21(17)           | 29(30)           | 70(70)           |

|                 |         |        |        |        |        |         |
|-----------------|---------|--------|--------|--------|--------|---------|
| <b>Positive</b> | 14 (78) | 4 (22) | 14(78) | 4 (28) | 18(41) | 26 (59) |
| <b>negative</b> |         |        |        |        |        |         |

---

\*\* Significant difference ( $p < 0.05$ ). RA= Rheumatoid arthritis. RgpA= arginine-gingipain; PPAD= Pg-peptidyl arginine deiminase.
