# Supplementary material for: The Interaction Effect of Anti-RgpA and Anti-PPAD Antibody Titers: An Indicator for Rheumatoid Arthritis Diagnosis
Source: MDPI journal article supplement (doi:10.3390/jcm12083027), 2023-04-21
Supplement: s1 [file s1]

**Table S3.** The operational capacity of anti-RgpA, anti-PPAD, and RgpA-PPAD diagnostic tests.

| <b>Anticuerpos</b>   | <b>n</b> | <b>Sensibilidad</b> | <b>Especificidad</b> | <b>VPP</b> | <b>VPN</b> | <b>Área bajo la curva ROC</b> |
|----------------------|----------|---------------------|----------------------|------------|------------|-------------------------------|
| <b>Anti-RgpA</b>     | 255      | 32%                 | 87.4%                | 76.7%      | 50%        | 0.60                          |
| <b>Anti-PPAD</b>     | 255      | 38%                 | 69%                  | 61.4%      | 46.4%      | 0.53                          |
| <b>RgpAQ1-PPADQ2</b> | 255      | 23.1%               | 93.7%                | 82.5%      | 48.6%      | 0.58                          |
| <b>RgpAQ1-PPADQ1</b> | 255      | 12.6%               | 95.2%                | 78.3%      | 45.9%      | 0.54                          |
